# Supplementary material for: HLJ1 amplifies endotoxin-induced sepsis severity by promoting IL-12 heterodimerization in macrophages
Source: eLife. 2022 Aug 19;11:e76094. doi: 10.7554/eLife.76094 (PMC9457701; doi:10.7554/eLife.76094)
Supplement: Figure 1—figure supplement 1—source data 1. [file elife-76094-fig1-figsupp1-data1.xlsx]

## Sheet: Figure 1- figure supplement 1A
	hr	Dnajb4+/+								Dnajb4-/-
WBC	0	5.11	5.41	7.38	8.42	3.87	3.72	5.62		5.23	4.12	6.53	3.82	5.48	4.97	6.06
	4	1.62	0.84	1.1	0.93					1.01	1.09	0.99	1.07
	8	1.84	1.87	1.69	2.19	2.17				2.57	1.81	1.76	2.03	2.36	2.23
NEUT	0	0.3	0.26	0.48	0.82	0.13	0.44	0.51		0.3	0.3	0.64	0.17	0.3	0.34	0.41
	4	0.42	0.32	0.25	0.28					0.37	0.3	0.28	0.24
	8	0.77	0.59	0.68	0.69	0.8				1.03	0.59	0.51	0.6	0.83	0.92
LYMPH	0	4.76	5.07	6.76	7.42	3.66	3.14	5.07		4.87	3.79	5.76	3.63	5.12	4.53	5.6
	4	1.06	0.46	0.75	0.53					0.53	0.74	0.65	0.68
	8	0.97	1.03	0.83	1.35	1.15				1.24	1.11	1.09	1.17	1.36	0.98
MONO	0	0.03	0.04	0.04	0.04	0.01	0.01	0.02		0.02	0.02	0.05	0.01	0.03	0.01	0.04
	4	0.04	0.02	0.04	0.05					0.02	0.02	0.02	0.03
	8	0.08	0.19	0.14	0.09	0.13				0.18	0.07	0.09	0.16	0.12	0.25
EOS	0	0.01	0.03	0.09	0.12	0.06	0.01			0.03	0	0.08	0.01	0.02	0.08	0.01
	4	0.09	0.04	0.06	0.07					0.09	0.03	0.04	0.12
	8	0.02	0.06	0.04	0.06	0.09				0.12	0.04	0.07	0.1	0.05	0.08
NEUT(%)	0	5.8	4.8	6.6	9.8	3.2	9			5.7	7.3	9.8	4.4	5.5	6.9	6.7
	4	25.9	38	22.7	30.1					36.6	27.5	28.3	22.4
	8	41.9	31.5	40.2	31.6	36.9				40.1	32.6	29	29.6	35.2	41.3
LYMPH(%)	0	93.2	93.7	91.6	88.1	94.6	90.2			93.1	92	88.2	95	93.4	91.1	92.4
	4	65.4	54.8	68.2	57					52.5	67.9	65.7	63.6
	8	52.7	55.1	49.1	61.6	53				48.2	61.3	61.9	57.6	57.6	43.9
MONO(%)	0	0.6	0.7	0.5	0.5	0.3	0.3	0.4		0.4	0.5	0.8	0.3	0.5	0.2	0.7
	4	2.5	2.4	3.6	5.4					2	1.8	2	2.8
	8	4.3	10.2	8.3	4.1	6				7	3.9	5.1	7.9	5.1	11.2
EOS(%)	0	0.2	0.6	1.2	1.4	1.6	0.2			0.6	0	1.2	0.3	0.4	1.6	0.2
	4	5.6	4.8	5.5	7.5					8.9	2.8	4	11.2
	8	1.1	3.2	2.4	2.7	4.1				4.7	2.2	4	4.9	2.1	3.6

## Sheet: Figure 1- figure supplement 1B
	hr	Dnajb4+/+							Dnajb4-/-
ALT (U/L)	0	82	23	40	23	29			23	46	28	32	32
	4	67	80	146	96				136	135	71	234
	8	84	178	138	76	232	234	112	73	118	113	189	197	106	105	101	82

## Sheet: Figure 1- figure supplement 1C
	hr	Dnajb4+/+											Dnajb4−/−
HDL (mg/dL)	0	73	91	48	77	89							88	78	86	91	87
	4	70	51	68	73								62	64	50	63
	8	76	64	81	72	82	78	64					76	74	78	76	72	70	74	80	76
LDL (mg/dL)	0	16.2	14.6	14.3	13.3	11.5							17	12.9	11.7	10.6	9.5
	4	8.7	9.8	9.1	9.1								10.7	10	9.6	11.6
	8	21.6	17.3	21.3	17.1	17.7	15	16.7	13.1	10.2	17.9	16.5	15.4	15.3	17	19.8	20.2	10.7	22.5	16.2	15.4	20	15.3	13.4
