# Supplementary material for: HLJ1 amplifies endotoxin-induced sepsis severity by promoting IL-12 heterodimerization in macrophages
Source: eLife. 2022 Aug 19;11:e76094. doi: 10.7554/eLife.76094 (PMC9457701; doi:10.7554/eLife.76094)
Supplement: Figure 1—source data 1. [file elife-76094-fig1-data1.xlsx]

## Sheet: Figure 1A
10 mg/kg
time (hr)	Dnajb4+/+	Dnajb4-/-
25		1
29		1
30		1
32	1
37	1
39	1
60	0	0
60	0	0
60	0	0
60	0	0
60	0	0
60	0	0
60	0	0
60		0

## Sheet: figure 1B
20 mg/kg
time (hr)	Dnajb4+/+	Dnajb4-/-
17	1
18	1
18	1
19	1
19	1
20	1
20	1
21	1
22	1
23	1
16.5	1
20.5	1
20.5	1
22.5	1
22.5	1
23	1
25	1
27	1
48	0
16		1
20		1
22		1
23		1
23		1
30		1
48		0
48		0
48		0
48		0
15.5		1
48		0
48		0
48		0
48		0
44		1
26		1
36		1
25		1

## Sheet: Figure 1C
creatinine			BUN			AST			ALT
control	Dnajb4+/+	Dnajb4-/-	control	Dnajb4+/+	Dnajb4-/-	control	Dnajb4+/+	Dnajb4-/-	control	Dnajb4+/+	Dnajb4-/-
0.1	0.2	0.1	29.4	43.5	33.5	84	478	530	20	434	458
0.2	0.5	0.2	29.9	148.4	23.7	88	600	750	22	490	600
0.1	0.9	0.3	28.8	140	61.6	78	884	328	23	600	93
0.1	0.3	0.3	26.5	65.7	109.4	80	1215	583	35	943	427
0.2	0.5	0.2	21.4	136.8	63.9	75	1303	254	28	1009	74
	1.1	0.4		110	40
