# Supplementary material for: HLJ1 amplifies endotoxin-induced sepsis severity by promoting IL-12 heterodimerization in macrophages
Source: eLife. 2022 Aug 19;11:e76094. doi: 10.7554/eLife.76094 (PMC9457701; doi:10.7554/eLife.76094)
Supplement: Figure 2—figure supplement 1—source data 1. [file elife-76094-fig2-figsupp1-data1.xlsx]

## Sheet: Figure 2- figure supplement 1A
serum IL-1a
Dnajb4+/+	Dnajb4-/-
297.143	123.452
221.369	224.286
369.494	536.161
300.446	206.28
258.065	318.72
381.935	303.244
349.464	178.869
	246.696
	203.75

## Sheet: Figure 2- figure supplement 1B
	hr	Dnajb4+/+								Dnajb4−/−
tnfa	0	1.46972	0.866418	0.663864						0.970479	1.46295	1.01666	0.787624
	4	134.212	111.095	231.326	168.05	160.36	126.26	128.475	166.329	118.647	161.407	210.151	184.325	82.5925	92.7269	117.72	134.138
	8	74.6555	67.3191	134.942	86.4741	69.2692	63.9019	50.694	72.6688	47.1614	44.9432	54.7786	32.3101	61.7783	67.0134	46.3575	28.8057
mcp-1	0	0.00132594	0.00102633	0.00064772						0.00131794	0.00133494	0.00104459	0.00056262
	4	1.43512	1.36987	2.665	1.85766	3.13458	1.54148	1.43462	1.64165	1.43063	1.69359	2.40681	1.17545	1.30125	1.17914	1.49068	1.26267
	8	1.33452	0.705855	1.62762	1.32915	0.948465	0.407327	1.0627	1.07499	1.05468	0.928288	0.796646	1.23347	0.209964	0.517899	1.50091	0.22194
il1b	0	1.01222	1.12685	1.34158	0.699487	0.819867				1.08526	1.7861	1.39534	2.30476	1.5025	0.736476
	4	92.228	129.088	145.455	95.0762	113.899	134.602			71.4218	76.9731	93.4045	95.5724	137.63	97.8732
	8	61.0309	61.0543	47.1994	39.5116	44.3039	63.6262			41.5612	39.8666	39.8875	54.284	49.6209	25.5856
il6	0	0.00218083	0.00379295	0.00439876						0.0136408	0.0138507	0.00724386	0.00581402
	4	3.72455	4.96755	7.69694	5.45544	5.49954	3.18079	3.40658	4.60373	2.55434	2.8922	4.83625	3.34911	3.1363	3.35569	3.45047	4.06732
	8	3.5823	2.18822	2.76735	3.04487	1.69058	1.24211	2.51111	3.12128	1.87254	1.96387	2.43502	1.48525	0.363436	1.36288	3.05403	0.844204

## Sheet: Figure 2- figure supplement 1C
		Dnajb4+/+															Dnajb4−/−
IL-6	0	0.002	0.013	0.009													0.007	0.012	0.013
	4	307.001	197.3	201.789	252.279	290.593	289.237	355.603	234.752	270.216	354.643						211.428	224.929	172.813	235.887	264.736	241.836	296.984	158.129	137.064	236.363	283.553
	8	172.958	112.349	274.862	260.68	123.987	220.38	236.094									219.279	152.753	205.194

## Sheet: Figure 2- figure supplement 1E
	Dnajb4+/+					Dnajb4−/−
+PBS	55.4	73.4	74.8	63.4	60.7	55.1	67.9	62.5	61.9	58.3
+LPS	68.1	65.5	77.5	64.4	80	65.7	60.5	63.8	75	71.4
