# Supplementary material for: HLJ1 amplifies endotoxin-induced sepsis severity by promoting IL-12 heterodimerization in macrophages
Source: eLife. 2022 Aug 19;11:e76094. doi: 10.7554/eLife.76094 (PMC9457701; doi:10.7554/eLife.76094)
Supplement: Figure 2—source data 1. [file elife-76094-fig2-data1.xlsx]

## Sheet: Figure 2A
		Dnajb4+/+								Dnajb4−/−
IL-1a	0	51.12	54.56	43.47	38.69	42.84	42.35	32.52		55.3	58.31	137.78	32.31	172.63	50.45	73.6
	4	334.53	539.86	241.2	333.48	312.61				415	441.4	385.47	442.15	232.54	302.89
	8	174.84	250.04	466.73	454.99	154.07	346.18			110.43	136.23	295.98	157.21	106.57	44.18
	18	515.43	705.6	798.56	657.87	478.8	317.63	556.28		319.59	486.35	194.97	149.18	414.59	743.37	515.64	263.94
IFN-g	0	7.99	32.22	27.12	3.79	16.82	231.81	10.54			24.92	14.82	3.79	10.73	41.32	28.51
	4	2803.04	5293.63	4329.6	2119.06	4378.11					3122.79	2200.57	1852.92	1325.81	1428.03
	8		16251.7	13434.3	25193	14280.2	18811.9			8236.34	10217.5	16555.6	12568.1	4406.78
	18	6853.07	9050.08	11743.1	14513.3	9436.05	10586	12067.1		6475.51	8032.18	2530.45	3104.32	6686.01		10276	6838.42
TNF-a	0	2.48	45.96	32.71	2.48	39.65	58.08	33.73		2.48	41.46	45.43	2.48	2.48	66.21	60.46
	4	794.88	1006.7	631.22	566.13	984.43				756.49	740.81	587.55	784.85	835.6	1021.97
	8	216.23	337.47	263.38	308.84	256.98	290.98			319.67	322.39	321.36	344.8	251.44
	18	298.28	361.48	370.83	434.6	388.28	400.77	459.64		479.82	461.86	166.49	157.7	371.98	356.3	331.35	322.53
Mcp-1	0	2.39	28.2	37.32	17.53	30.12	48.47	31.12		2.39	24.93	31.43	2.39	71.04	64.42	74.68
	4	10278.4	22226.2	11466.1	6065.37	33288.4				34893.1	13439	12030.3	13623.4	10284.3	20893.7
	8	12787.9	17332.3	29101.1	36404.5	13501.5	19450.5			16442.1	13727.2	19676.1	22691.9	12035.7
	18	5723.19	11002.9	10539.2	12409.6	8513.44	5936.68	10520.3		6229.69	7672.76	963.91	857.61	8281.53	8870.26	5283.71	3207.81
IL-12p70	0	9.37	8.61	18.72	4.76	17.64	15.36	10.06		5.36	9.45	8.2	3.62	5.31	29.96	14.34
	4	192.19	388.62	196.89	165.47	209.44				164.01	224.24	96.07	98.29	148.26	111.02
	8	44.24	35.36	52.08	166.32	39.16	66.12			7.58	21.01	18.91	35.78	25.29
	18	100.33	46.74	50.66	39.81	49.66	19.02	22.84		19.555	30.84	5.175	16.335	14.97	20.56	24.67
IL-1b	0	189.57	86.68	90.9	76.03	100.33	72.19	84.59		19.53	75.38	19.53	94.53	43.86	104.42	25.48
	4	288.26	450.57	216.86	258.68	274.49				287.97	378.83	196.74	198.26	250.57	235.24
	8	180.85	260.65	660.21	565.58	101.06	422.07			111.04	417.11	440.22	318.17	246.45
	18	222.98	315.17	317.07	296.16	262.68	228.74	398.12		195.01	255.14	85.85	92.85	215.65	361.24	348.81	310.12
IL-10	0	736.77	470.88	478.73	409.85	500.87	357.89	399.96		158.16	487.19	226.68	516.25	255.63	390.63	305.54
	4	1989.36	1230.94	734.69	978.28	1202.92				1274.81	1745.6	1296.14	1575.37	1286.4	1838.69
	8	461.02	637.39	1019.24	738.29	512.13	768.17			613.92	1067.47	1032.87	1003.93	797.48
	18	1394.01	1570.47	1416.78	1413.72	1239.31	976.3	1838.23		1497.28	1797.79	1055.09	1159.26	1525.29	327.52	1357.44	1389.28
IL-27	0	711.32	368.35	432.82	303.14	370.48	301.03	338.13			339.62	152.5	457.55	210.17	423.41	103.03
	4	2149.06	4446.5	1197.65	1444.62	2195.69				2107.54	2507.1	1782.03	1768.48	2805.94	2670.76
	8	900.51	1253.73	2220.24	1650.25	1037.34	2054.82			1292.52	2161.01	2005.55	1779.84	1320.78
	18	735.08	1048.89	939.7	1013.03	579.56	1092.22	861.04		1122.37	917.8	146.07	401.61	859.9	1477.39	1102.08	1498.69
IL-17A	0	209.41	148.27	141.66	123.03	143.95	115.35	127.12			134.41	82.67	150.85	101.47	147.47	40.63
	4	321.5	465.36	274.5	284.34	269.75				229.4	661.5	189.83	137.46	188.84	195.46
	8	240.62	261.96	354.34	442.73	191.89	360.01			225.34	308.4	323.41	287.76	253.89
	18	819.1	1726.23	2178.69	1859.97	1010.65	921.95	1742.8		900.77	1416.97	40.25	121.11	972.88	3828.76	860.96	820.96
IFN-b	0	186.41	126.65	119.01	113.6	126.86	105.91	107.32		6.02	114.1	34.69	131.06	76.87	134.14	26.76
	4	288.26	450.57	216.86	258.68	274.49				287.97	378.83	196.74	198.26	250.57	235.24
	8	202	198	142	237	177	151.42				266.52	244.43	209.01	208.03
	18	222.98	315.17	317.07	296.16	262.68	228.74	398.12		195.01	255.14	85.85	92.85	215.65	361.24	348.81	310.12
GM-CSF	0	82.7	42.57	47.69	31.27	47.25	30.5	36.59		45.74	19.58	46.25	24.54	56.48	20.24
	4	159.19	197.53	157.61	189.02	203.67				175.86	324.82	129.78	126.89	143.86	160.36
	8	102.47	137.14	135.07	186.32	100.36	146.29			91.85	201.45	187.9	187.89	143.26
	18	199.42	157.27	157.52	157.09	154.94	111.84	124.84		138.7	165.36	23.85	75.27	138.7	145.21	150.73	280.55

## Sheet: Figure 2B
	hr	Dnajb4+/+																				Dnajb4−/−
IFN-g (ng/mL)	0	0.00523	0.002578	0.00398	0.00324	0.00516																0.003233	0.00783	0.00263	0.00465	0.00168
	8	18.6186	25.3679	21.4013	21.381	13.6858	23.2236	11.9404	20.496	16.8457	15.5762	11.8301	24.0854	42.8055	23.6736	11.8029	22.8604	34.2397	15.9	30.264	34.6181	25.9497	17.3361	25.7379	12.1551	6.38949	10.2081	5.07213	0.8125	10.8711	11.6647	20.821	0.8125	10.2212	26.1209	0.8125	4.61951	0.853283	1.0694	7.80743	27.1354	2.01376	18.8564	13.7738
	18	7.44559	10.8116	10.4154	4.26819	5.32371	7.99235	10.1387	7.31128	6.50676												7.66674	3.18554	3.95751	0.159154	0.296458	4.5531	11.2064	4.97639

## Sheet: Figure 2C
serum IFN-g (ng/kg)
Dnajb4+/+	Dnajb4−/−
4.7014	1.22118
4.90312	1.80958
2.60222	3.55304
4.67545	3.0475
5.39058	1.36798
5.70998	2.22172
3.06139	4.28575
5.51714	3.62285

## Sheet: Figure 2D
serum IFN-g (ng/mL)	dead					alive
Dnajb4+/+	21.381	23.2236	20.496	16.8457		13.6858	11.9404
Dnajb4−/−	20.821					10.2081	5.07213	1.9804	10.8711	11.6647

## Sheet: Figure 2E
hr	Dnajb4+/+	Dnajb4−/−	Dnajb4+/+ +anti-IFN-γ	Dnajb4−/− +anti-IFN-γ
15	1
15	1
18	1
19	1
19	1
48	0
22	1
23	1
27	1
18		1
24		1
24		1
28		1
33		1
33		1
48		0
48		0
48		0
48		0
21			1
21			1
24			1
35			1
48			0
48			0
48			0
48			0
48			0
48			0
21				1
28				1
33				1
40				1
48				0
48				0
48				0
48				0
48				0
48				0
