# Supplementary material for: HLJ1 amplifies endotoxin-induced sepsis severity by promoting IL-12 heterodimerization in macrophages
Source: eLife. 2022 Aug 19;11:e76094. doi: 10.7554/eLife.76094 (PMC9457701; doi:10.7554/eLife.76094)
Supplement: Figure 3—source data 1. [file elife-76094-fig3-data1.xlsx]

## Sheet: Figure 3D
B	T	NK	HSC	Div	DC	Mac	Neut	PLT
0.417411	1.02173	0.816447	0.53331	-0.324327	1.25722	1.84415	1.83936	1.65323
0.719543	0.735765	0.765209	0.728546	0.941032	0.987387	1.4392	1.39458	1.39223
0.523839	0.726672	0.713342	-0.514966	-0.482075	0.949326	1.43094	1.38507	1.33527
0.35426	0.716	0.683724	-0.810724	-0.330175	0.89641	1.28315	1.35846	1.22666
0.341133	0.712844	0.577447	-0.484027	-0.315011	0.878156	0.946289	1.29559	1.16133
-0.328603	0.667656	0.567888	-0.774134	-0.450496	0.849222	0.814774	1.1737	1.09961
-0.283546	0.656474	0.513624	1.68367	-0.304196	0.8056	0.801934	1.16919	1.04473
-0.370367	0.569184	0.500365	-0.825271	-0.395104	0.804887	0.79393	1.0696	0.978942
0.835746	0.556862	0.455875	0.4479	-0.269382	0.724831	0.763774	1.05287	0.906269
0.67011	0.551438	0.451222	-0.524481	-0.431509	0.716794	0.739356	1.05129	0.886831
0.674592	0.478485	0.443956	0.307829	-0.27931	0.710576	0.673201	1.04796	0.8316
-0.425434	0.478288	0.379872	-0.33266	-0.588719	0.709919	0.646568	1.0344	0.768775
-0.27117	0.47483	0.372467	-0.354322	-0.510165	0.686472	0.629961	0.987781	-0.403988
0.634961	0.45352	0.365073	-0.445332	-0.432917	0.675442	0.622996	0.981054	-0.43845
-0.451466	0.450084	0.361695	0.869038	-0.346182	0.6706	0.620044	0.777902	-0.459226
0.407268	0.446753	0.350188	-0.422618	0.989979	0.669462	0.613561	0.765252	-0.463555
0.390278	0.43684	0.339684	-0.383373	-0.267764	0.662396	0.608672	0.738025	-0.493892
0.73466	0.412263	0.334998	-0.354195	-0.262586	0.649459	0.587693	0.584965	-0.50678
0.265329	0.409315	0.33093	0.544766	-0.405706	0.648582	0.583099	-0.326951	-0.540436
-0.278026	0.407695	0.329406	-0.255804	-0.268236	0.647995	0.564753	-0.331989	-0.577202
0.381271	0.402934	0.32558	-0.454358	-0.577424	0.64234	0.548542	-0.331989	-0.583161
0.410414	0.375844	0.320881	-0.341071	-0.406982	0.642169	0.527196	-0.331989	-0.598755
-0.380923	0.373931	0.302289	-0.26204	-0.253235	0.636805	0.523525	-0.331989	-0.638993
0.422101	0.364387	0.301719	-0.477169	-0.254382	0.636629	0.521588	-0.331989	-0.678861
0.561182	0.363394	0.288214	-0.496193	0.406872	0.635267	0.514856	-0.331989	-0.725295
0.284413	0.355861	0.288144	0.390469	-0.413695	0.624553	0.490188	-0.35333	-0.734689
0.388749	0.347018	0.287919	-0.445181	-0.255671	0.607636	0.4811	-0.35333	-0.75027
0.360989	0.346837	0.28632	0.264432	-0.339417	0.606204	0.477174	-0.35333	-0.796447
0.353139	0.340741	0.282121	-0.372401	-0.419451	0.604242	0.47655	-0.35333	-0.840534
0.398441	0.339846	0.274033	0.473964	-1.17313	0.597782	0.475664	-0.35333	-0.850183
0.436324	0.336214	0.26663	-0.293044	-0.297845	0.590361	0.474486	-0.35333	-0.853225
-0.404845	0.332516	0.266334	-0.592231	-0.451267	0.580738	0.473343	-0.35333	-0.858358
0.437946	0.330705	0.263642	-0.274418	-0.253782	0.569603	0.470474	-0.381183	-0.881787
0.375639	0.324705	0.262976	1.34328	0.351935	0.558449	0.469441	-0.392571	-0.895401
0.279241	0.319795	0.259133	0.519087	-0.273159	0.555244	0.469223	-0.396506	-0.896825
0.297647	0.317888	0.257844	-0.337857	-0.402188	0.541216	0.467498	-0.407606	-0.899019
0.585883	0.316725	0.256857	-0.266402	-0.380494	0.535542	0.466881	-0.4094	-0.956046
0.331241	0.315939	0.256349	-0.548687	-0.369391	0.530807	0.465562	-0.4094	-1.07203
0.422353	0.311402	0.254136	-0.398402	-0.414064	0.529603	0.463976	-0.4094	-1.11452
0.310291	0.310116	-0.250206	-0.387242	-0.537549	0.524402	0.463812	-0.4094	-1.17266
0.346656	0.309248	-0.251108	-0.58376	0.467182	0.523189	0.459333	-0.4094
0.316336	0.309033	-0.251144	-0.343936	-0.618476	0.520881	0.452305	-0.4094
0.294969	0.308997	-0.252167	0.69735	-0.408269	0.514755	0.442526	-0.4094
0.318423	0.306773	-0.255748	-0.311453	0.375231	0.512087	0.43857	-0.415806
0.301268	0.305275	-0.258149	0.919633	-0.485659	0.509413	0.431144	-0.457179
0.310599	0.302075	-0.258364	0.555491	-0.325654	0.49314	0.429881	-0.457179
0.299359	0.301062	-0.260789	-0.585529	0.906363	0.489618	0.428495	-0.457179
-0.262101	0.298116	-0.262593	0.948035	-0.342484	0.485109	0.42469	-0.457918
0.328041	0.296453	-0.265383	-0.335576	-0.264594	0.482859	0.423963	-0.460792
0.416717	0.295135	-0.268709	0.520524	-0.3976	0.475337	0.42395	-0.460792
0.261562	0.293173	-0.268753	-0.274713	-0.27015	0.474234	0.423677	-0.472652
0.332858	0.29263	-0.269199	-0.270877	-0.295459	0.469625	0.422767	-0.472652
0.275579	0.288252	-0.27194	-0.334207	-0.297517	0.467733	0.421279	-0.472652
0.426998	0.288001	-0.27481	1.19133	-0.326029	0.465135	0.418515	-0.472652
0.338839	0.286974	-0.276093	0.901538	-0.303878	0.461236	0.417328	-0.477209
0.411231	0.285697	-0.279011	0.43385	-0.408001	0.459123	0.415865	-0.479578
0.459954	0.28475	-0.280172	0.283903	-0.488161	0.448388	0.415701	-0.479578
0.354688	0.284525	-0.281035	0.535762	-0.388656	0.447308	0.414523	-0.479578
0.447412	0.283622	-0.28276	-0.336141	-0.292798	0.43411	0.414108	-0.484432
0.253273	0.281913	-0.284712	0.45047	0.534906	0.432005	0.413269	-0.489599
0.446215	0.281273	-0.286777	-0.317799	-0.37054	0.431884	0.411585	-0.506231
0.356875	0.279704	-0.292427	-0.343273	-0.642792	0.429024	0.405572	-0.509307
0.320989	0.277424	-0.297568	-0.775555	-0.29667	0.428747	0.398453	-0.520527
0.349235	0.275853	-0.29977	-0.347657	-0.260283	0.427926	0.398054	-0.52257
0.354427	0.275387	-0.306217	0.513401	-0.444497	0.421947	0.397674	-0.523729
0.259756	0.274779	-0.306698	-0.310671	-0.299856	0.420801	0.394762	-0.524134
0.358551	0.273965	-0.30693	0.64665	-0.272731	0.419911	0.393737	-0.524926
0.314565	0.26695	-0.308645	0.791881	-0.38038	0.417612	0.391993	-0.525046
0.445556	0.263444	-0.31046	-0.322784	-0.509298	0.415994	0.387831	-0.525787
0.423653	0.262733	-0.314661	-0.27098	-0.302971	0.415108	0.386897	-0.530904
0.254361	0.262472	-0.31689	0.634853	-0.276622	0.413824	0.383411	-0.53324
0.261517	0.258895	-0.318564	0.533323	0.563404	0.413369	0.380654	-0.54024
0.344056	0.257214	-0.325538	-0.280189	0.445752	0.411902	0.380111	-0.547231
0.350294	0.250672	-0.330755	-0.276944	0.480689	0.411046	0.380038	-0.549365
0.427151	-0.251291	-0.331933	0.328646	-0.27499	0.409706	0.379391	-0.549707
0.263551	-0.253176	-0.336489	-0.365064	0.314827	0.40927	0.378062	-0.55454
0.332024	-0.255357	-0.348849	-0.285098	-0.578236	0.40864	0.375128	-0.556089
0.311262	-0.255406	-0.361441	0.836379	-0.361372	0.408623	0.374388	-0.556894
0.263327	-0.256498	-0.36483	0.740086	-0.551111	0.408063	0.373388	-0.574971
0.268215	-0.262444	-0.365016	-0.297276	-0.434452	0.404685	0.371655	-0.577374
-0.458767	-0.264299	-0.365327	-0.532684	-0.293085	0.404543	0.370351	-0.579854
-0.264571	-0.26816	-0.388446	0.604461	0.297126	0.401461	0.369894	-0.583243
0.280846	-0.269425	-0.397776	-0.336327	-0.357578	0.401097	0.369387	-0.585469
0.293481	-0.270983	-0.40435	-0.252532	-0.266995	0.399256	0.362978	-0.585469
0.264828	-0.271308	-0.408649	-0.26404	-0.306029	0.398743	0.36023	-0.589133
0.438064	-0.272026	-0.416108	-0.531126	0.442607	0.397026	0.360191	-0.591731
0.34973	-0.274979	-0.42519	-0.378157	-0.280337	0.396912	0.358388	-0.593341
0.255753	-0.278432	-0.431509	-0.297121		0.395674	0.355364	-0.596585
0.30946	-0.279265	-0.441824	0.963743		0.395093	0.354583	-0.600122
0.335307	-0.280268	-0.442638	0.870721		0.394074	0.35206	-0.610943
0.280494	-0.280303	-0.443683	0.428345		0.392835	0.350465	-0.612368
0.299985	-0.286999	-0.458206	-0.325419		0.391502	0.345668	-0.616612
0.290016	-0.287138	-0.472127	-0.299936		0.391053	0.342938	-0.616977
0.320123	-0.292264	-0.47996	-0.254726		0.390632	0.34276	-0.622834
0.28356	-0.29355	-0.483726	-0.276743		0.388174	0.341447	-0.627041
0.251523	-0.29757	-0.498823	-0.387675		0.386545	0.340405	-0.628259
0.271122	-0.302996	-0.510634			0.384675	0.337171	-0.628405
0.392043	-0.303032	-0.512663			0.382631	0.329654	-0.637449
0.271032	-0.310262	-0.548642			0.382421	0.325881	-0.651921
0.275698	-0.312196	-0.565124			0.380724	0.323193	-0.656948
0.294966	-0.315384	-0.625132			0.380082	0.321607	-0.670055
0.544967	-0.335748	-0.697319			0.378557	0.318974	-0.672831
-0.480769	-0.342158	-0.775098			0.377569	0.317292	-0.712554
0.255895	-0.371157				0.375837	0.315514	-0.713405
	-0.373881				0.374756	0.31407	-0.713877
	-0.397237				0.372796	0.312944	-0.714549
	-0.40043				0.372093	0.311496	-0.719494
	-0.410028				0.36602	0.310817	-0.72456
	-0.410431				0.365717	0.309357	-0.737758
	-0.410466				0.363729	0.308882	-0.754227
	-0.540478				0.363419	0.308221	-0.755185
	-0.558373				0.363062	0.307454	-0.772153
	-0.578804				0.360239	0.306845	-0.79788
	-0.594826				0.359188	0.305824	-0.800122
	-0.604132				0.356002	0.299664	-0.815549
	-0.630626				0.355901	0.298998	-0.838912
	-0.643585				0.355773	0.298876	-0.869868
					0.355769	0.298282	-0.886803
					0.35435	0.297457	-0.905121
					0.352942	0.29613	-0.986923
					0.352774	0.29587	-0.996726
					0.352622	0.294346	-1.01068
					0.349327	0.293542	-1.20955
					0.347472	0.291734
					0.34557	0.291137
					0.342608	0.291039
					0.342538	0.291005
					0.341217	0.290372
					0.340623	0.289215
					0.340551	0.288142
					0.340185	0.28613
					0.338735	0.285118
					0.338722	0.284982
					0.338298	0.283776
					0.33802	0.282655
					0.337475	0.279627
					0.336714	0.279562
					0.336068	0.279427
					0.335867	0.278737
					0.330944	0.278218
					0.330441	0.277328
					0.330404	0.275321
					0.328392	0.273942
					0.327034	0.272903
					0.326932	0.272868
					0.326462	0.271417
					0.325374	0.266968
					0.324411	0.266453
					0.322089	0.266018
					0.321735	0.265299
					0.321693	0.264441
					0.321019	0.26371
					0.320394	0.26277
					0.31983	0.260808
					0.319559	0.259729
					0.319422	0.257867
					0.31899	0.257837
					0.318456	0.257812
					0.318377	0.255403
					0.318327	0.254829
					0.317535	0.253079
					0.317453	0.253019
					0.31736	0.25301
					0.31657	0.252957
					0.316454	0.252883
					0.316124	0.250619
					0.315497	-0.254246
					0.313764	-0.25463
					0.312843	-0.257601
					0.31204	-0.25882
					0.311889	-0.261348
					0.311705	-0.262726
					0.310621	-0.263298
					0.309235	-0.264522
					0.308469	-0.265582
					0.307381	-0.265959
					0.304824	-0.26645
					0.304262	-0.266552
					0.303945	-0.268404
					0.302453	-0.270601
					0.301085	-0.272674
					0.299798	-0.273612
					0.299546	-0.274204
					0.298232	-0.274761
					0.294451	-0.275808
					0.29254	-0.278002
					0.292088	-0.27905
					0.290917	-0.281591
					0.290286	-0.282806
					0.289063	-0.283467
					0.288021	-0.283477
					0.285875	-0.285164
					0.284371	-0.286779
					0.279381	-0.287047
					0.279192	-0.287224
					0.27871	-0.289858
					0.278663	-0.292209
					0.276839	-0.2925
					0.273561	-0.294195
					0.273365	-0.294575
					0.270758	-0.297313
					0.270339	-0.29812
					0.268267	-0.298833
					0.266695	-0.299903
					0.266587	-0.301724
					0.266382	-0.301855
					0.265522	-0.302534
					0.263116	-0.306677
					0.262929	-0.309044
					0.2612	-0.309308
					0.261103	-0.309505
					0.259869	-0.309853
					0.258965	-0.30993
					0.258065	-0.310395
					0.257347	-0.312811
					0.257232	-0.313675
					0.254977	-0.31568
					0.252447	-0.315852
					0.251338	-0.317239
					-0.25185	-0.317548
					-0.259756	-0.317907
					-0.260557	-0.318076
					-0.260917	-0.321806
					-0.261747	-0.323165
					-0.262235	-0.32465
					-0.262432	-0.325296
					-0.26837	-0.327998
					-0.269657	-0.328352
					-0.272108	-0.330627
					-0.272247	-0.334145
					-0.272768	-0.33482
					-0.273254	-0.336946
					-0.274362	-0.338524
					-0.275104	-0.338738
					-0.276004	-0.338897
					-0.276497	-0.339989
					-0.276644	-0.340094
					-0.276766	-0.342749
					-0.2791	-0.342901
					-0.281357	-0.342922
					-0.282124	-0.343998
					-0.283818	-0.344808
					-0.283892	-0.346993
					-0.28438	-0.347677
					-0.284739	-0.347928
					-0.285593	-0.348606
					-0.285761	-0.348723
					-0.288101	-0.349375
					-0.291276	-0.349406
					-0.291738	-0.353383
					-0.29373	-0.357913
					-0.297032	-0.3613
					-0.297986	-0.366166
					-0.29871	-0.367448
					-0.306958	-0.369171
					-0.30709	-0.370565
					-0.31558	-0.370789
					-0.32016	-0.370821
					-0.32073	-0.375721
					-0.322898	-0.376281
					-0.323774	-0.376796
					-0.324765	-0.378382
					-0.325106	-0.379302
					-0.325165	-0.379505
					-0.328056	-0.380387
					-0.330561	-0.381528
					-0.331364	-0.381735
					-0.333758	-0.381823
					-0.334765	-0.382183
					-0.336486	-0.383025
					-0.337061	-0.387425
					-0.337522	-0.390012
					-0.338523	-0.393425
					-0.339101	-0.397072
					-0.341957	-0.407684
					-0.344039	-0.410692
					-0.344937	-0.411729
					-0.345156	-0.413397
					-0.347312	-0.422016
					-0.350229	-0.424105
					-0.350249	-0.435254
					-0.350383	-0.442701
					-0.357073	-0.445995
					-0.35748	-0.448598
					-0.358166	-0.45259
					-0.361683	-0.457743
					-0.364735	-0.462955
					-0.369069	-0.467332
					-0.369924	-0.467603
					-0.371574	-0.479951
					-0.373444	-0.486374
					-0.374452	-0.493047
					-0.374639	-0.495892
					-0.377018	-0.499007
					-0.378601	-0.514423
					-0.381601	-0.541301
					-0.382448	-0.542838
					-0.382988	-0.57079
					-0.38622	-0.571979
					-0.389237	-0.572702
					-0.391747	-0.576156
					-0.392106	-0.604205
					-0.392299	-0.610945
					-0.393595	-0.613598
					-0.393919	-0.691337
					-0.393983	-0.69638
					-0.398517	-0.722445
					-0.404797	-0.777326
					-0.407594	-0.800033
					-0.408417	-1.17742
					-0.40907
					-0.414664
					-0.417143
					-0.418463
					-0.419379
					-0.421704
					-0.422592
					-0.424853
					-0.439151
					-0.439324
					-0.441518
					-0.44338
					-0.451299
					-0.45193
					-0.452276
					-0.452945
					-0.453911
					-0.454811
					-0.457218
					-0.457521
					-0.457915
					-0.458761
					-0.462871
					-0.465615
					-0.46566
					-0.46623
					-0.467383
					-0.467863
					-0.469342
					-0.470221
					-0.474601
					-0.483148
					-0.484042
					-0.488923
					-0.489858
					-0.49026
					-0.490338
					-0.490871
					-0.490941
					-0.491483
					-0.492846
					-0.494604
					-0.498446
					-0.501291
					-0.502786
					-0.511857
					-0.517013
					-0.519167
					-0.521967
					-0.532563
					-0.535184
					-0.539144
					-0.54336
					-0.544373
					-0.545494
					-0.554732
					-0.556886
					-0.562437
					-0.564808
					-0.569163
					-0.569844
					-0.572526
					-0.600538
					-0.63058
					-0.656567
					-0.667699
					-0.677154
					-0.681245
					-0.718551
					-0.807047
					-0.850578
					-0.967109
					-1.13149

## Sheet: Figure 3E
signaling pathways	-log(p-value)
1. Putative pathways of MHC class I-dependent postsynaptic long-term depression in major depressive disorder	9.10922
2. Immune response_Induction of the antigen presentation machinery by IFN-gamma	7.37071
3. Immune response_Antigen presentation by MHC class I, classical pathway	7.30463
4. Cooperative action of IFN-gamma and TNF-alpha on astrocytes in multiple sclerosis	7.05132
5. Role of TLR signaling in skin sensitization	6.67252

## Sheet: Figure 3F
signaling pathways	-log(p-value)
1. Immune response_Antimicrobial actions of IFN-gamma	5.26938
2. DNA damage_Role of SUMO in p53 regulation	5.23927
3. Signal transduction_MIF signaling pathway	5.21726
4. Signal transduction_CXCR4 signaling via PI3K cascade	5.06696
5. Signal transduction_mTORC2 downstream signaling	4.85985
