# Supplementary material for: HLJ1 amplifies endotoxin-induced sepsis severity by promoting IL-12 heterodimerization in macrophages
Source: eLife. 2022 Aug 19;11:e76094. doi: 10.7554/eLife.76094 (PMC9457701; doi:10.7554/eLife.76094)
Supplement: Figure 4—source data 1. [file elife-76094-fig4-data1.xlsx]

## Sheet: Figure 4C
networks	-log(p-value)
1. Inflammation_NK cell cytotoxicity	6.157
2. Inflammation_IFN-gamma signaling	4.572
3. Cell cycle_G1-S Interleukin regulation	4.013
4. Apoptosis_Apoptotic nucleus	3.824
5. Development_ERK5 in cell proliferation and neuronal survival	3.725

## Sheet: Figure 4D
hr	Dnajb4+/+										Dnajb4−/−
0	0.0007167	0.00054	0.00060288								0.0003077	0.00098201	0.00076222	0.00070456
4	0.211682	0.179796	0.0658869	0.121611							0.0766204	0.0842094	0.052369	0.0566531
8	0.144013	0.129112	0.338538	0.431836	0.852004	1.22267	1.36112	1.94956			0.0105153	0.0996715	0.428432	0.0161656	0.0871807	0.0528963	0.236217	0.388464
18	0.0123626	0.0110485	0.01								0.0131682	0.011682	0.012626
