# Supplementary material for: HLJ1 amplifies endotoxin-induced sepsis severity by promoting IL-12 heterodimerization in macrophages
Source: eLife. 2022 Aug 19;11:e76094. doi: 10.7554/eLife.76094 (PMC9457701; doi:10.7554/eLife.76094)
Supplement: Figure 5—figure supplement 1—source data 1. [file elife-76094-fig5-figsupp1-data1.xlsx]

## Sheet: Figure 5- figure supplement 1A
		B cell					CD4+ T cell					CD8+ T cell					others
0 hr	Dnajb4+/+	61.4502	47.8504	55.022			15.7223	22.857	18.2522			8.03315	11.2834	9.36488			14.7943	18.0092	17.3608
	Dnajb4−/−	55.8096	57.932	53.2896			16.8983	16.5612	17.2575			10.9932	8.98852	11.5498			16.2988	16.5183	17.9031
8 hr	Dnajb4+/+	60.57	69.35	64.5	65.06		20.4643	13.5294	18.2692	18.4979		13.0082	9.26636	11.4593	10.7584		5.96	7.85	5.77	5.68
	Dnajb4−/−	57.06	60.06	63.1	61.34		24.1081	20.7628	19.2278	19.992		11.9008	12.3012	10.6643	11.561		6.93	6.88	7.01	7.11
18 hr	Dnajb4+/+	70.81	65.06	60.56	57.13		12.21	15.99	17.76	20.43		6.26	7.25	7.83	8.91		10.71	11.7	13.86	13.53
	Dnajb4−/−	63.06	67.57	59.21			16.83	12.62	17.89			8.83	7.29	9.87			11.28	12.53	13.03

## Sheet: Figure 5- figure supplement 1B
NK cell (%)	Dnajb4+/+					Dnajb4−/−
0	1.53333	2.13333	1.2	1.26667		1.6	1.66667	1.26667	2
8	1.57333	1.93333	1.33333	1.43333		1.64667	1.46667	1.72	1.79333
18	1.55333	2	1.58	1.78667		1.66667	2.03333	1.94

## Sheet: Figure 5- figure supplement 1C
numbers (x10^5 per spleen)		Dnajb4+/+				Dnajb4−/−
total B cell	0	128.065	133.887	200	187	283.29	266.729	230.922	167
	8	272.565	520.125	354.75	416.384	325.242	282.282	315.5	398.71
	18	381.361	263.493	265.088	99.8642	469.132	191.648	248.678	200
total CD4+ T cell	0	61.1736	44.4138	51.1	77.7	85.776	76.2505	74.7826	55.7
	8	92.0893	101.471	100.481	118.387	137.416	97.585	96.1389	129.948
	18	65.7705	64.7433	77.7361	35.7096	99.1	35.7831	75.1513	65.7
total CD8+ T cell	0	30.1986	22.7879	35	41.1	55.8015	41.3847	50.0493	30
	8	58.5367	69.4977	63.0262	68.8538	67.8345	57.8155	53.3216	75.1462
	18	33.7398	29.3785	34.2824	15.5702	45.33	20.6755	41.4462	22
