# Supplementary material for: HLJ1 amplifies endotoxin-induced sepsis severity by promoting IL-12 heterodimerization in macrophages
Source: eLife. 2022 Aug 19;11:e76094. doi: 10.7554/eLife.76094 (PMC9457701; doi:10.7554/eLife.76094)
Supplement: Figure 5—source data 1. [file elife-76094-fig5-data1.xlsx]

## Sheet: figure 5A
NK cell (%)		CD4+ T cell (%)		CD8+ T cell (%)
Dnajb4+/+	Dnajb4−/−	Dnajb4+/+	Dnajb4−/−	Dnajb4+/+	Dnajb4−/−
43.73	23.27	3.57	2.2	1.27	0.88
49.98	25.3	4	2.65	0.87	0.53
51.55	19	2.77	1.6	0.9	0.8
38.22	34	2.44	2.6	1.4	1.3

## Sheet: figure 5B
Dnajb4+/+	Dnajb4−/−
0.0233466	0.0190914
0.0382089	0.00400085
0.0351401	0.00118681
0.0232444	0.0152523

## Sheet: figure 5C
Dnajb4+/+	Dnajb4−/−
96.7	92.6
98.1	89.9
83.9	93.5
84.4	94.1
87.6	80.1

## Sheet: Figure 5D
IFN-g (pg/mL)	Dnajb4+/+					Dnajb4−/−
control	11.3926	11.1502	9.69579	3.65726	9.40439	11.2714	10.6654	9.4534	13.9905	6.26959
+IL-12p70	156.587	145.195	177.918	177.987	138.86	153.8	168.101		170.672	200
