# Supplementary material for: HLJ1 amplifies endotoxin-induced sepsis severity by promoting IL-12 heterodimerization in macrophages
Source: eLife. 2022 Aug 19;11:e76094. doi: 10.7554/eLife.76094 (PMC9457701; doi:10.7554/eLife.76094)
Supplement: Figure 6—source data 1. [file elife-76094-fig6-data1.xlsx]

## Sheet: Figure 6A
Sham	Dnajb4+/+	Dnajb4−/−
1.05353	5.73006	1.67894
1.10001	3.49127	1.12853
1.39695	3.75984	1.11849
1.53686	4.42377	2.12582
1.40723		1.1991

## Sheet: Figure 6B
Sham	Dnajb4+/+	Dnajb4−/−
0.430944	0.470656	0.192803
0.463225	1.50382	0.221106
0.340599	1.5387	0.141532
0.342271	1.90953	0.194574
0.339085	5.28341	0.267067
	5.77412

## Sheet: Figure 6C
creatinine			BUN			ALT			AST
Sham	Dnajb4+/+	Dnajb4−/−	Sham	Dnajb4+/+	Dnajb4−/−	Sham	Dnajb4+/+	Dnajb4−/−	Sham	Dnajb4+/+	Dnajb4−/−
0.2	0.6	0.3	30.3	105.6	87.1	26	293	51	91	711	254
0.2	0.6	0.4	27.7	80.4	98.5	20	132	203	78	276	398
0.2	1.1	0.1	21.5	128.7	36.1	22	292	67	85	1025	314
	1.1	0.5		93.9	104		62	200		236	403
	1.1	0.2		124.4	36.7		272	247		795	441
	0.5			104.5			222			634
	0.6			123.4			174			539
	0.6			106.9			299			782

## Sheet: Figure 6E
hr	Dnajb4+/+ +CLP	Dnajb4−/− +CLP	Dnajb4+/+ +CLP+Primaxin	Dnajb4−/− +CLP+Primaxin
14	1
18	1	1
18	1
24	1	1	1
24	1	1		1
24	1		1
36		1	1
36		1	1	1
42	1		1
42			1
48	1	1		1
48	1		1
60		1
72			1	1
84		1
96			1	0
96				0
96				0
96				0
96				0
