# Supplementary material for: HLJ1 amplifies endotoxin-induced sepsis severity by promoting IL-12 heterodimerization in macrophages
Source: eLife. 2022 Aug 19;11:e76094. doi: 10.7554/eLife.76094 (PMC9457701; doi:10.7554/eLife.76094)
Supplement: Figure 7—source data 1. [file elife-76094-fig7-data1.xlsx]

## Sheet: figure 7A
		Dnajb4+/+												Dnajb4−/−
il12b	0	0.499915	1.79349	0.706593										0.392367	0.430581	0.972558	0.929244
	4	250.182	334.422	265.732	176.314	470.175	173.081	247.127	360.133					106.865	204.642	119.859	91.2682	191.242	101.911	343.231	216.643
	8	29.8852	9.36438	10.9156	12.7213	10.4898	30.8335	24.157	27.9576	14.7302	5.17736	17.1762	20.8585	12.0196	22.7941	10.0499	15.2005	7.68182	24.2342	17.5974	11.7056	3.47219	9.94926	36.2656	19.3891
il18	0	0.761347	1.15283	1.08582										0.709504	0.848676	1.13288	1.07757
	4	1.56755	1.77456	2.43853	1.45756	2.21806	2.0485	1.79781	1.91238					1.43137	1.45596	1.65767	1.42766	1.82077	1.76066	1.88859	2.03143
	8	1.19433	1.12952	1.06269	1.21871	1.04484	1.04441	1.3028	1.05812					1.28641	1.09781	0.975899	0.870827	1.22572	1.02317	1.47821	1.37743

## Sheet: Figure 7B
		Dnajb4+/+															Dnajb4−/−
IL-12p70	0	0.402649	0.411924	0.794553													0.214911	0.4	0.709703	0.5
	4	108.031	60.9081	62.7637	94.3554	99.8833	80.6121	131.61	86.0957	122.324	112.479	101.403	128.75	102.906	115.656		54.2861	60.2102	48.5169	58.4969	47.9722	112.971	36.9117	38.7044	45.9172	73.3238	37.6283	43.9613	70.7073	47.911	77.3187
	8	13.8753	9.01504	15.9098	24.9768	15.439	9.47293	28.8518	22.8107								9.43335	11.7755	16.3192	12.4693	4.61849	9.39912	7.93366

## Sheet: Figure 7C
		Dnajb4+/+								Dnajb4−/−
IL-12p70	isotype	107.93	135.48	139.488	109.924	80.2716	81.4824	88.0958		83.8375	73.1688	69.0466	59.6586	42.4881	54.1552
	anti-IL-12 100μg	0.972342	5.61798	2.70095	2.80759	3.80584	3.11954	3.33791		5.94209	5.4019	3.67329	2.15248	2.7452	7.01897	4.0866
	anti-IL-12 500μg		0.648228	4.64564	3.58747	3.61867	4.71051			5.72602	4.64564	4.75367	4.39855	2.27726	2.86998	4.11779
IFN-g	isotype	21.1707	16.2037	16.6524	22.9222	17.5556	19.7357	15.3902	10.6117	13.561	16.9424	11.9943	7.8904	13.9938
	anti-IL-12 100μg	4.86351	3.28675	6.58404	1.66092	6.06741	8.44311	5.33461	3.31646	0.615367	1.23703	4.09065	5.14621	7.55378
	anti-IL-12 500μg	2.57361	3.40177	9.84776	7.8156	6.68994	3.9355	5.24116		4.5817	1.17035	2.179	5.61166	6.63952	4.72371

## Sheet: Figure 7D
	Dnajb4+/+	Dnajb4−/−	Dnajb4+/+ +anti-IL-12	Dnajb4−/− +anti-IL-12
17	1
18	1
18	1
19	1
20	1
22	1
23	1
23	1
48	0
18		1
23		1
24		1
26		1
31		1
48		0
48		0
48		0
48		0
19			1
22			1
25			1
29			1
48			0
48			0
48			0
48			0
48			0
48			0
18				1
23				1
26				1
48				0
48				0
48				0
48				0
48				0
48				0
