# Supplementary material for: HLJ1 amplifies endotoxin-induced sepsis severity by promoting IL-12 heterodimerization in macrophages
Source: eLife. 2022 Aug 19;11:e76094. doi: 10.7554/eLife.76094 (PMC9457701; doi:10.7554/eLife.76094)
Supplement: Figure 8—figure supplement 1—source data 1. [file elife-76094-fig8-figsupp1-data1.xlsx]

## Sheet: Figure 8- figure supplement 1B
	Dnajb4+/+					Dnajb4−/−
-MΦ	0	1	0	0	1	2	0	0	0	0
+MΦ	33	32	27	23	33	33	28	26	23	31
