# Supplementary material for: HLJ1 amplifies endotoxin-induced sepsis severity by promoting IL-12 heterodimerization in macrophages
Source: eLife. 2022 Aug 19;11:e76094. doi: 10.7554/eLife.76094 (PMC9457701; doi:10.7554/eLife.76094)
Supplement: Figure 8—source data 1. [file elife-76094-fig8-data1.xlsx]

## Sheet: figure 6C
		Dnajb4+/+					Dnajb4−/−
IL-12	+PBS-Lip	2.1	3.15	4.44			3.27	4.24	3.33
	+PBS-Lip	145.06	96.41	96.45	165.23	65.64	79.06	60.98	88.49	50.12	22.95
	+Clo-Lip	30.94	24.03	35.43	18.99		14.66	21.49	24.43	15.52	13.98	7.59
	+Mφ+Clo-Lip	114.14	82.45	87.3	65.64		55.61	76.96	87.95	78.88
	+Mφ+Clo-Lip	55.23	66.67	35.73	45.4	33.9	12.51	22	66.5	54.43	44.3
IFN-g	+PBS-Lip	0.0285267	0.00520598	0.0201449			0.00927436	0.032443	0.0104874
	+PBS-Lip	20.4679	13.2956	21.1039	21.6689		8.93328	10.872	9.59037	11.397
	+Clo-Lip	1.70904	2.48438	2.17905			0.624578	1.80279	1.25486	1.26753
	+Mφ+Clo-Lip	12.95	10.57	8.45	25.64	12.24	14.98	18.03	10.91	10.06	9.98
	+Mφ+Clo-Lip	5.51	6.21	9.19	7.16	5.55	7.27	7.77	3.25	5.68	8.12

## Sheet: figure 6D
hr	Dnajb4+/+ +Dnajb4+/+ BMDMs	Dnajb4−/− +Dnajb4−/− BMDMs	Dnajb4+/+ +Dnajb4−/− BMDMs	Dnajb4−/− +Dnajb4+/+ BMDMs
48	0
20	1
16	1
16	1
24	1
23	1
24	1
19	1
27	1
48				0
20				1
18				1
29				1
23				1
23				1
22				1
22				1
27				1
48				0
18			1
24			1
28			1
24			1
33			1
18			1
48			0
48			0
48			0
48			0
48			0
22		1
24		1
28		1
29		1
48		0
48		0
48		0
48		0
48		0
48		0
