# Supplementary material for: HLJ1 amplifies endotoxin-induced sepsis severity by promoting IL-12 heterodimerization in macrophages
Source: eLife. 2022 Aug 19;11:e76094. doi: 10.7554/eLife.76094 (PMC9457701; doi:10.7554/eLife.76094)
Supplement: Figure 9—figure supplement 1—source data 1. [file elife-76094-fig9-figsupp1-data1.xlsx]

## Sheet: Figure 9- figure supplement 1B
	Dnajb4+/+				Dnajb4−/−
0	0.00251186	0.00236411	0.00177308	0.00221635	0.00203576	0.0025447	0.00136264	0.00164174
24	4.58305	4.20573	5.0463	4.49714	3.67168	4.97611	4.86899	5.06518
48	5.73542	6.02395	5.77974	5.40255	5.56024	5.79411	6.18156	6.04365

## Sheet: Figure 9- figure supplement 1C
	hr	Dnajb4+/+					Dnajb4−/−
il12b	0	8.88648e-05	0.00109455	0.00090293	8.923e-05		0.00075079	0.0003338	0.00021251	0.00103189
	4	6.75864	4.48566	5.29611	3.53497	5.22	3.83779	6.40937	6.04123	4.03581	4.33
	8	0.982868	1.10273	0.70678	1.4		0.800322	0.866886	0.6252	1.33
il6	0	8.98744e-06		4.78186e-05	2.56393e-05		9.38189e-06	2.7912e-05	3.0163e-05	2.33004e-05
	4	0.470682	0.734181	0.69804	0.532609		0.53	0.741931	0.689428	0.573253
	8	0.114377	0.147667	0.07231	0.11		0.0748899	0.106487	0.0946966	0.123
il18	0	0.365624	0.652337	0.517551	0.317901		0.299969	0.551473	0.559272	0.33085
	4	3.02	3.70724	2.96017	2.57127		3.03	4.05139	3.71846	2.22653
	8	1.71566	1.84012	1.41382	1.45		1.86208	1.96857	1.77952	1.44
il12a	0	0.0194468	0.00993083	0.00602246	0.0031846	0.022249	0.0830176	0.0141831	0.0258333	0.0268455	0.0466241
	4	3.83113	5.15114	4.77409	3.43988	4.17726	3.18828	5.41164	4.48846	4.30864	3.21495
	8	0.390628	0.66286	0.908682	1.16375		1.53679	0.173905	1.08409	1.01367
