# Supplementary material for: HLJ1 amplifies endotoxin-induced sepsis severity by promoting IL-12 heterodimerization in macrophages
Source: eLife. 2022 Aug 19;11:e76094. doi: 10.7554/eLife.76094 (PMC9457701; doi:10.7554/eLife.76094)
Supplement: Figure 9—source data 1. [file elife-76094-fig9-data1.xlsx]

## Sheet: Figure 9A
	Dnajb4+/+							Dnajb4−/−
0	1.99874	1.99874	8.31054	8.15275	3.89228	0.157795		0.94677	1.31496	9.7307	4.36566	1.42016	1.68315
12	336.419	403.85	275.247	244.425	280.56	309.226	299.758	224.385	285.241	175.836	175.363	107.09	153.903	251.525
24	173.624	179.724	140.128	134.005			163.594	93.1524	135.97	93.4951	82.1167		65

## Sheet: Figure 9B
	Dnajb4+/+					Dnajb4−/−
0	0.206044	0.15	0.17	0.12		0.207674	0.13	0.14	0.18
5	1.40803	1.57095	1.28837	1.37806		1.08723	1.15634	0.928371	0.787052
8	0.510604	0.457996	0.451807	0.492037		0.350718	0.443555	0.397136	0.363096

## Sheet: Figure 9C
		Dnajb4+/+					Dnajb4−/−
il12a	0	0.0194468	0.00993083	0.00602246	0.0031846	0.022249	0.0830176	0.0141831	0.0258333	0.0268455	0.0466241
	4	9.20852	11.8172	8.69774	6.6	7.7	7.42135	7.47605	7.75327	11.1	9.2
	8	2.78208	2.99188	3.31485	1.5	1.3	1.34322	1.56333	1.51938	3.01	2.6
il1b	0	8.88648e-05	0.00109455	0.00090293	8.923e-05		0.00075079	0.0003338	0.00021251	0.00103189
	4	20.1834	24.8301	20.1921	18.7	17.8	16	18.3154	17.7362	20.5	21.3
	8	8.57836	9.67052	8.38838	7	7.5	7.47853	9.48733	7.92822	11	6
il18	0	0.365624	0.652337	0.517551	0.317901		0.299969	0.551473	0.559272	0.33085
	4	1.46535	1.62655	1.158	1.45	2	1.53651	1.40495	1.33756	1.5	1
	8	0.556595	0.5593	0.542572	0.77	0.65	0.579446	0.644497	0.569856	0.78	0.68
il6	0	8.98744e-06		4.78186e-05	2.56393e-05		9.38189e-06	2.7912e-05	3.0163e-05	2.33004e-05
	4	0.40854	0.523522	0.383276	0.77	0.7	0.53025	0.571572	0.529384	0.829	0.86
	8	0.205645	0.20236	0.229425	0.15	0.25	0.14802	0.168178	0.143892	0.35	0.31

## Sheet: Figure 9D
0 h	2 h	4 h	8 h	16 h	32 h
0.566857	0.707699	0.800346	0.705725	0.668806	0.464168
0.459968	0.830195	0.905993	0.713275	0.583713	0.492137
0.333333	0.732101	0.809693	0.886242	0.793601	0.378481
0.384615	0.707724	0.836059	0.736693
0.526316	0.625511	0.750356	0.760193

## Sheet: Figure 9E
	LMW				HMW
control	37.05	44.9	30.4	41.59	62.94	55.1	69.58	58.39
shHLJ1	16.76	15.88	15.01	23.11	83.23	84.11	85.02	77.21
